# Supplementary material for: A retrieval of xCO2 from ground-based mid-infrared NDACC solar absorption spectra and comparison to TCCON
Source: Copernicus journal article supplement (doi:10.5194/amt-2023-32), 2023-03-15
Supplement: Supplementary file [file amt-2023-32-AC1-supplement.pdf]

## improvementResponse to reviewer 1.

The authors appreciate the comments and corrections of the reviewers.

The formatting of the manuscript, figures and tables need to be improved for better presentation of the content. Some passages in the text require extra explanation to help the audience understand the ideas more clearly. Here are some general comments that I think would help improve the manuscript:

1. Please consider making the figures, axis labels and numbers, legends, symbols larger so they are easier to read. **Done.**

2. For CO<sub>2</sub>, O<sub>2</sub>, N<sub>2</sub>, CH<sub>4</sub>, use subscripts throughout the text. **Done.**

3. There are undefined citations throughout the text shown as question marks. Please make sure to link them to the right references. **Corrected.**

4. Define all the variables introduced in the equations before or after the Equation. **Done.**

5. In section 4.2, why don't you apply an airmass correction to the retrievals to see if it improves the retrievals? and maybe use those for comparisons in the following sections?

**In section 4.2 there is no air mass correction because the test is to determine if one is needed. The correction is calculated in section 4.3 and not from the airmass directly because we wanted to see how the retrieval without modification behaves against 6300.**

6. What is the purpose of section 5.1? If it's to evaluate the precision of measurements why don't you use a shorter period of time let's say 20 minutes for averaging. Because as you said we expect XCO<sub>2</sub> to change during the day and the SD wouldn't necessarily represent the precision of measurements. If the reason is the limited number of measurement points from NDACC please state it in the text.

**It is indeed due to the lack of measurements from InSb. One day is the minimum to average a few data points. This has been included in the text.**

**(" However this strategy was still chosen as, due to the small amount of data points of InSb spectra, it is the shorter time period to make a meaningful average." line 276)**

7. In table 4, could you add a column presenting the values from Wunch et al to make the comparisons easier? **Adding those values would not result in an equivalent comparison. In Wunch et. al, the values used are at SZA 20 and 70. However, because of limited data availability for those tests (2 days) the average of all SZA were used. This difference makes a proper comparison harder, however the plot could be added in the supplemental plots for a comparison of the behaviour of the perturbations.**

Minor corrections and comments:

- Line 10: Do you mean precision of 0.2%? **Corrected.**
- Line 10: I am assuming in the first part of the sentence you are talking about the averaging kernel comparisons and at the end you are talking about the seasonality observed in the

retrieved value? Can you make this more clear? Maybe split it up into two sentences?

Corrected.

• Line 11: We don't usually refer to specific sections in the abstract. Maybe you can say: In addition, we propose an optimal retrieval strategy to improve the quality of the data product.

Corrected.

• Line 15: Define XCO 2 for the first time. Corrected.

• Line 15: main net sources of what? CO 2 ? Corrected.

• Line 20: validation is repeated twice Corrected.

• Line 20: need additional space after of CO 2 Corrected.

• Line 25: do you mean pre recorded spectra? No, per or for each, I clarified this. Line 28

• Line 27: NDACC trace gas products, ... Corrected.

• Line 28: Expand the temporal and spatial coverage of the total column products. Corrected.

• Line 30: Define XCO 2 for the first time. Corrected.

• Line 42: What do you mean by 'tropospheric signal is damped in comparison to TCCON' ? lower sensitivity due to the low AKs, I used the same language as in the reference. It is corrected and clarified. Line 46

• Line 60: ... since 1992 which covers the mid-infrared ...Corrected.

• Line 82: 21113 → 01101 Add more explanation for this notation or remove it here and refer

to table F1.  $\nu_1\nu_2l_2\nu_3n$  Three of these,  $\nu_1\nu_2\nu_3$ , express the number of quanta activated for each fundamental;  $l_2$  is the  $l$  value for the degenerate  $\nu_2$  fundamental and its overtones; the fifth integer is the  $n$ th component of the Fermi interacting  $\nu_1$  and  $2\nu_2$  vibrational states including their overtone and combination states). (Toth et. al, 2008) . Line 87

• Line 85: Buckingham (1976) should be in brackets. Corrected.

• Line 90: Which appendix? Corrected.

• Line 92: 'on the left' / 'towards the left' : please be more specific. You can use the approximate wavenumber. Corrected.

• Line 102: Please move this to the data availability section at the end of the manuscript.

Corrected.

• Line 108 : Wunch et al. (2015) is describing GGG2014. GGG2020 is still in preparation you can cite <https://agu.confex.com/agu/fm20/meetingapp.cgi/Paper/675531> for now. Corrected.

• Equation 1: Define VC here. Corrected.

• Line 125: These are two main important differences...Corrected.

• Line 126: you haven't explained what is airmass and what is in situ correction yet. No, the airmass or in situ corrections are described in section 4.2 and 4.4 correspondingly, with more detail. This is now stated in the text. Line 137

• Line 132: not abundant (usually less than 20) Be more clear. What do you mean by less than 20? less than 20 spectra per day? Yes less than 20. I clarified.

• Equations 3 and 4: Define all the elements in the equations. Corrected.

• Line 141: This sentence is not clear. Corrected.

• Line 143: Which retrieval windows are the test spectra from? The question is not clear. If you mean which spectra the retrievals from I have corrected the text.

• Line 151: Strong sensitivity/ high sensitivity instead of good sensitivity. Corrected.

- Line 156: ... follow a similar curvature but at different altitude ... Not clear. Please explain in more details. **Done.**
- Line 167: Add citation to GEOS-FO-IT. **Done.**  
<https://gmao.gsfc.nasa.gov/pubs/docs/Lucchesi865.pdf> **Line 184**
- Line 171: Unclear. Break down the sentence into two or three. Explain how you construct the modified a priori separately in another sentence. Also what do you mean by other tests? **Corrected.**
- Line 174: same retrieval: do you mean same retrieval procedure or same retrieval algorithm? **Both. It has being clarified in line 192**
- Figure 3: Define  $\Delta\text{CO}_2$  both in the plot and in the caption. Is it fixed a priori minus standard a priori or vice versa? **I defined it in the caption as it would not fit in the Y axis of the plot.**
- Line 177: correlation coefficient  $r$  (between which two parameters?) **The retrievals with the fixed and standard a priori. Clarified. Line 195**
- Line 179: Please be consistent with Figure 3.  $\delta\text{CO}_2$  is the same as  $\Delta\text{CO}_2$ ? **Corrected.**
- Line 179: What do you mean by modified a priori? Is it the same as what you call as the fixed a priori used in Figure 3. **Yes, corrected.**
- Line 181: a over estimation → an over estimation **Corrected.**
- Line 183: I don't think artifact is a good description for the air mass independent correction. Air mass independent bias might be better. **Bias is a good alternative. I am using the language used in Wunch et al (2011a) to describe it for consistency.**
- Line 185: Add brackets to Wunch et al. (2011a) **Corrected.**
- Line 187: TCCON derives and applies a single empirical air mass correction: It's not in fact a single value. GGG2020 applies air mass correction for each retrieval window separately before averaging them for each gas. **It is a single correction, not a single value. This means the correction is only done once. This correction is performed after averaging all windows per gas, not before, it is one of the last steps of the retrieval algorithm. It is also possible to use the product of the averaged windows without the air mass correction. This has being rephrased for clarity**  
**“To correct this, TCCON applies an empirical correction. In GGG2014, the correction was derived separately for each xGAS product. In GGG2020, it is derived for each retrieval window.”** **Line 206**
- Line 192: the dependence is observed: which dependence are you referring to? **To the SZA. Clarified.**
- Figure 4: add : after Top in the caption. **Corrected.**
- Line 204: To investigate if the scaling between 6300 and w4790 is consistent between both locations.... **Corrected.**
- Figure 5: Define the ratio in the caption. Also what do you mean by H<sub>2</sub>O content? Is that XH<sub>2</sub>O? In addition, readers with colour vision deficiencies might not be able to differentiate between these colors. Please double check. **Corrected. All images have been checked several times for colorblindness. The colours are different levels, so even in scales of grey they are different shades.**
- Line 216: No brackets for Wunch et al. **Corrected.**

- Line 218: A higher dependence in what? How do you define XCO<sub>2</sub> bias? Do you mean bias between XCO<sub>2</sub> and column averaged in situ profiles? **To the airmass or xluft. A systematic distortion against a reference.**
- Line 225: ... , that aircrafts and balloons can't capture, in addition to the temperature sensitivity of the spectral window. **Corrected.**
- Line 228: The mean ratio... specify which ratio you are referring to. **Corrected.**
- Line 229: These biases or This bias **Corrected.**
- Line 229: airmass correction factor: do you mean in-situ correction factor? **Clarified.**
- Line 239: are you using 1 standard deviation for 6300 and 2 for 4790? Why? **I use 2 standard deviations (95%) for both.**
- Line 240: why don't you use standard error instead then? **Corrected by adding some text and referring to table 3 where the SEM is listed.**
- “one thing to consider is the difference in number of data points between InSb and InGaAs that affects the standard deviation. **For this reason the standard error was also calculated (shown in table 3) to have a representation of mean error.**” Line 270
- Figure 7: maybe bring the purple histogram forward for better visibility. **Improved.**
  - Line 258: All tests, except CO<sub>2</sub> ,... Do you mean CO<sub>2</sub> a priori profile? **Yes. Clarified.**
- Line 268: The w4790 retrieval is more sensitive to pressure perturbations than TCCON. How much is the value for TCCON? **For TCCON the pressure error (-0.1% profile perturbation) is -0.036 at SZA 20° and -0.033 at SZA 70°.**
- Line 271: ... the perturbation tests performed for this study. **Corrected.**
- Line 283: For the perturbations of xCO<sub>2</sub> ... Again do you mean perturbations in the a priori profile? **Corrected.**
- Figure 8: Again here I guess you mean CO<sub>2</sub> and H<sub>2</sub>O a priori. **Corrected.**
- Line 306: in the minimum SZA of 18°. Given that the maximum SZA ... **Corrected.**
- Line 326: Could you elaborate more on what you mean by the interferometer being abnormal? **Corrected. Of bad quality, that indicates change in source brightness like for example due to thin cloud conditions or an error in the solar tracker.**
- Line 391: Add proper citation. **It is unclear, citation on the lack of data?. The 67 matches shown in figure 6 is the total number available.**
- Line 347: how would a good temperature sensor improve errors? **Corrected. A better understanding of the temperature profile of the atmosphere to produce a more accurate a priori temperature profile. Line 360**
- Line 328 explain what is a window file. **Done.**
- Line 352: good sensitivity... high sensitivity? **Yes. Corrected.**
- Line 354: where does the bracket close? **Corrected.**
- Appendix A: Explain the parameters in the table. **Done.**
- Line 382: What do you mean by 1°AK? Do you mean averaging kernels were binned by 1 degree SZAs? **Yes, Clarified.**
- Line 393: ... each of the filters. **Corrected.**

- Line 403: refer to the corresponding figures in this sentence and the previous sentence.

Done.

- Figure D2: is 6300 opd in cm? Also could you add a legend describing colors? Also mention the date and time of measurements in the caption. Done
- Line 411: In resolution Fig D1 cm... not clear what you are referring to here! Corrected.
- Figure E1: this caption doesn't look like describing this figure. Corrected.
- Table F1: Describe the vibrational and rotational levels corresponding to each digit. Done.
- Figure G3: caption doesn't match the figure. Corrected.
- Figure H4: InGaAs spectra: which spectral window? Corrected.
- Figure H5: which one is on top and which one at the bottom? Corrected.

INSITU NOT AIRMASS
